# Supplementary material for: Adenosine Receptor 3 in Liver Cancer: Expression Variability, Epigenetic Modulation, and Enhanced Histone Deacetylase Inhibitor Effects
Source: PubMed Central journal article supplement (PMC11795062; doi:10.1016/j.gastha.2024.11.006), 2024-11-20
Supplement: mmc1.pdf [file mmc1.pdf]

# **ADENOSINE RECEPTOR 3 IN LIVER CANCER: EXPRESSION VARIABILITY, EPIGENETIC MODULATION, AND ENHANCED HDAC INHIBITOR EFFECTS**

Louise Kaldjob-Heinrich, Sandro Nuciforo, Steffen Lemke, Aaron Stahl, Stefan Czernel, Sepideh Babaei, Lauriane Blukacz, Marie-Anne Meier, Yizheng Zhang, Christian M. Schürch, Irene Gonzalez-Menendez, Pascal Woelfling, Nisar P. Malek, Veit Scheble, Sven Nahnsen, Manfred Claassen, Markus Templin, Hans Bösmüller, Markus H. Heim, Daniel Dauch, Michael Bitzer

## **SUPPLEMENTARY FIGURES & TABLES**

### **Table of Contents**

|                        |        |
|------------------------|--------|
| Supplementary Figure 1 | page 2 |
| Supplementary Figure 2 | page 3 |
| Supplementary Table 1  | page 4 |
| Supplementary Table 4A | page 5 |
| Supplementary Table 4B | page 6 |
| Supplementary Table 4C | page 7 |
| Supplementary Table 5  | page 8 |

Supplementary Tables 2 and 3 are provided as separate files in Excel format.

## Supplementary Figure 1

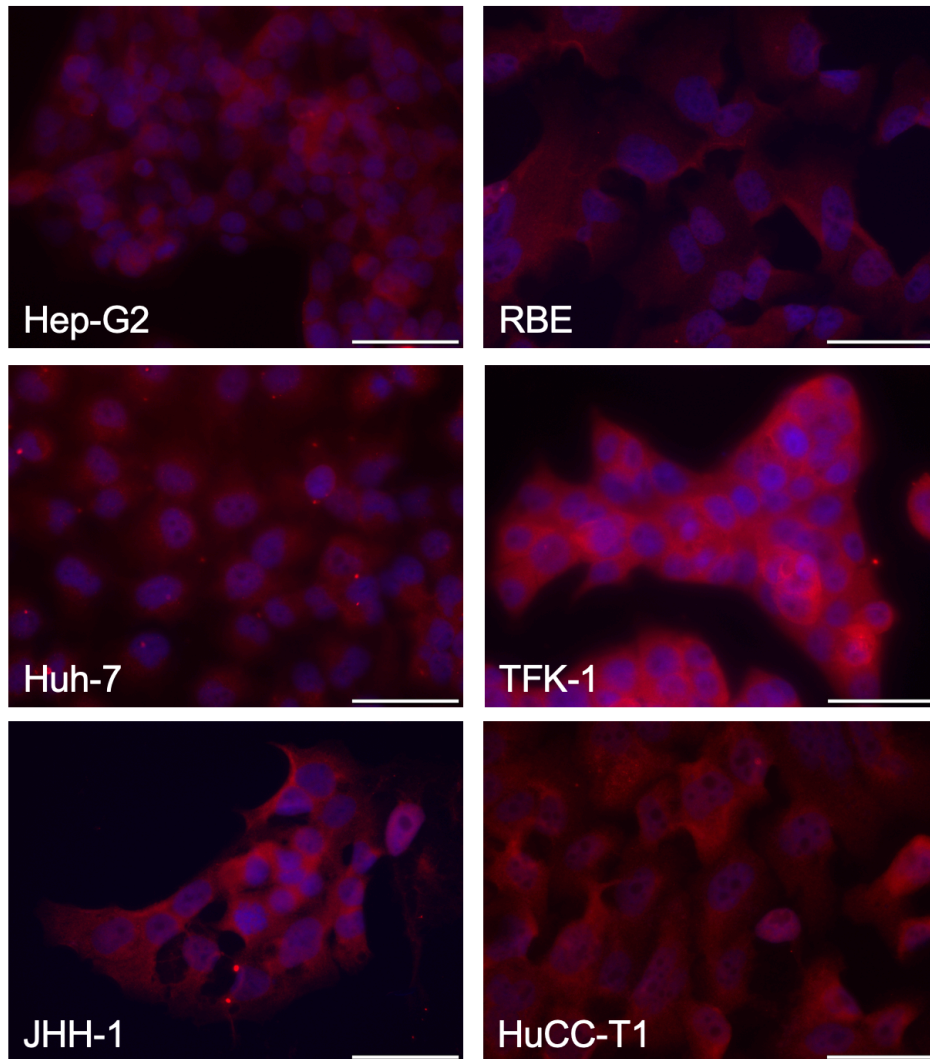

### **ADORA3 immunocytochemical staining in human-derived tumor cell lines.**

Representative pictures of the human HCC cell lines Hep-G2, Huh-7 and JHH-1 as well as the CCA cell lines RBE, TFK-1 and HuCC-T1 upon immunocytochemical staining of Adora3 (red) and DAPI staining (blue). Scale bar = 50μm

## Supplementary Figure 2

A

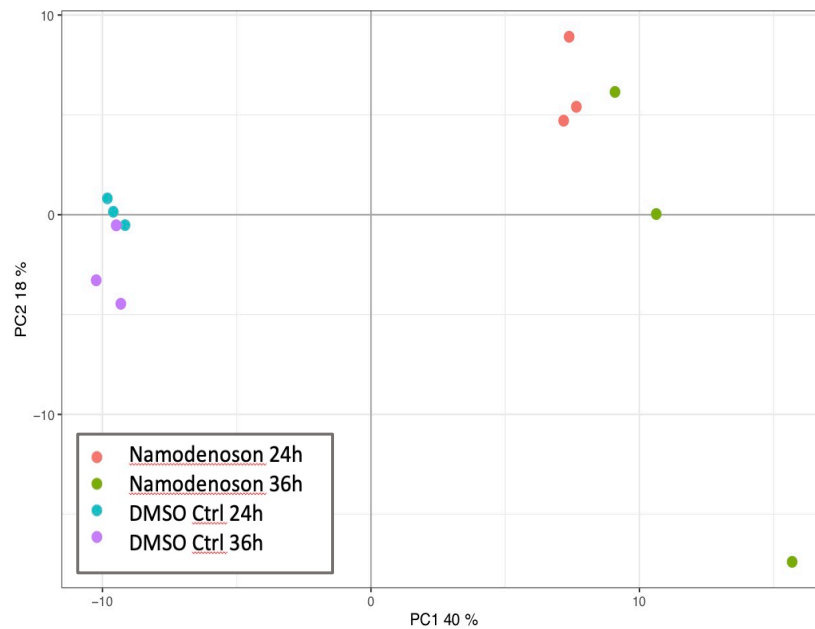

B

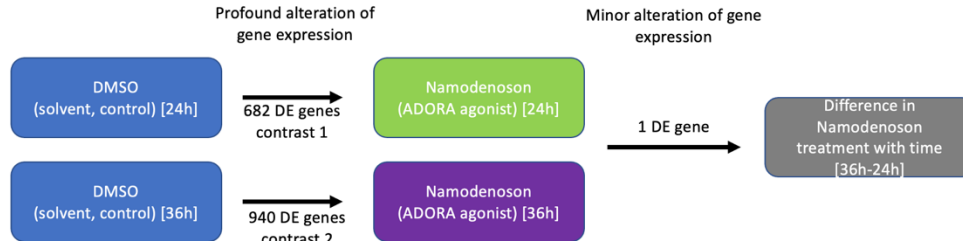

### HepG2 RNA-Seq. analysis after treatment with Namodenoson.

(A) Principal component analysis (PCA) of the normalized RNA-seq data of all Namodenoson (ADORA3 agonist) and DMSO (solvent control) treated samples at 24 and 36 h. The percentage of variation explained by PC1 and PC2 is indicated at each axis. Colors indicate samples from different treatment and timepoint combinations.

(B) Number of genes with a significantly altered expression after treatment with Namodenoson for 24 h or 36 h compared to untreated control cells (DMSO, solvent control), and number of genes significantly altered by Namodenoson between 36h and 24h of treatment. Genes were considered differentially expressed when the adjusted p-value was lower than 0.05 ( $\text{padj} < 0.05$ ) and a  $\log_2\text{FC}$  of greater than 0.5 or lower -0.5 was detected.

## Supplementary Table 1

IC50 values and 95% confidence interval (95% CI) of Namodenoson treated  
(A) human-derived HCC and CCA cell lines and (B) patient-derived organoids.

A

| IC50 Value Human HCC and CCA cell line |                     |              |                    |
|----------------------------------------|---------------------|--------------|--------------------|
| HCC (95% CI)                           |                     | CCA (95% CI) |                    |
| HepG2                                  | 35.3 (24.1 – 54.2)  | HUCCT1       | 23.9 (17.3 – 33.5) |
| Huh7                                   | 31.8 (25.6 – 40.3)  | RBE          | 46.8 (33.6 – 66.7) |
| JHH1                                   | 69.3 (38.9 – 177.5) | TFK1         | 13,9 (11.9 – 15.9) |

B

| IC50 Value Human HCC and CCA cell Organoids |                    |              |                  |
|---------------------------------------------|--------------------|--------------|------------------|
| HCC (95% CI)                                |                    | CCA (95% CI) |                  |
| Pat. 1                                      | 19.6 (17.2 – 22.2) | Pat.7        | 6.9 (3.3 – 13.8) |
| Pat.1P                                      | 15.2 (12.2 – 19.1) |              |                  |
| Pat. 2                                      | 17.8 (12.2 – 27.2) |              |                  |
| Pat. 2.2                                    | 15 (10.2 – 22.1)   |              |                  |
| Pat. 3                                      | 6.3 (4.7 – 8.1)    |              |                  |
| Pat. 4                                      | 10.5 (8.9 – 12.2)  |              |                  |
| Pat. 5                                      | 12.1 (8.4 – 17.4)  |              |                  |
| Pat. 6                                      | 18.1 (13.0 – 24.9) |              |                  |

## Supplementary Table 4A

DigiWest raw data (AFI) of control (n=2) and Namodenoson-treated (n=2) HepG2 cells.

Empty cell = weak signal (AFI = 33).

| #  | AFI                            | ctrl. 1 | ctrl. 2 | 20µM Nam. 1 | 20µM Nam. 2 |
|----|--------------------------------|---------|---------|-------------|-------------|
| 1  | Bmi1                           | 5633    | 5344    | 8494        | 8557        |
| 2  | Ezh2                           | 1655    | 1793    | 2387        | 2326        |
| 3  | GCN5L2                         | 578     | 655     | 712         | 781         |
| 4  | Histone deacetylase 1 (HDAC1)  | 108     | 139     |             |             |
| 5  | Histone deacetylase 2 (HDAC2)  | 9891    | 10066   | 7972        | 8782        |
| 6  | Histone deacetylase 3 (HDAC3)  | 65      | 101     | 60          |             |
| 7  | Histone deacetylase 6 (HDAC6)  | 3981    | 4220    | 3783        | 4945        |
| 8  | Histone H2A.X - phospho_Ser139 | 114     | 58      | 122         | 224         |
| 9  | Histone H2B                    | 263131  | 133716  | 369729      | 409341      |
| 10 | Histone H2B - acetyl_Lys15     |         |         |             | 58          |
| 11 | Histone H2B - acetyl_Lys5      | 1723    | 1809    | 1850        | 2144        |
| 12 | Histone H3                     | 826404  | 657112  | 970060      | 918638      |
| 13 | Histone H3 - acetyl_Lys14      | 108     | 122     | 187         | 301         |
| 14 | Histone H3 - acetyl_Lys18      | 4765    | 3863    | 8694        | 13446       |
| 15 | Histone H3 - acetyl_Lys23      |         |         | 2476        | 2937        |
| 16 | Histone H3 - acetyl_Lys9       | 7281    | 4963    | 11358       | 12245       |
| 17 | Histone H3 - acetyl_Lys9/Lys14 | 5394    | 3368    | 8704        | 8777        |
| 18 | Histone H3 - dimethyl_Lys4     | 1069    | 577     | 1408        | 1750        |
| 19 | Histone H3 - monomethyl_Lys4   | 996     | 568     | 1906        | 2247        |
| 20 | Histone H3 - phospho_Ser10     | 294     | 132     | 64          | 145         |
| 21 | Histone H3 - phospho_Thr3      |         |         |             |             |
| 22 | Histone H3 - trimethyl_Lys27   | 7896    | 4459    | 6795        | 7798        |
| 23 | Histone H3 - trimethyl_Lys9    | 21432   | 13808   | 23637       | 24199       |
| 24 | IDH1                           | 5458    | 6034    | 8080        | 8650        |
| 25 | IDH2                           | 6340    | 6276    | 9193        | 9035        |
| 26 | JARID1A                        |         | 56      |             |             |
| 27 | PCAF (KAT2B)                   | 61      |         | 76          | 72          |
| 28 | PDI                            | 1110    | 1183    | 2200        | 1896        |
| 29 | RING1A                         | 472     | 497     | 585         | 645         |
| 30 | RING1B                         |         |         | 80          | 68          |
| 31 | SP1                            | 117     | 166     | 64          | 54          |
| 32 | SUZ12                          | 558     | 614     | 729         | 689         |
| 33 | TBP (TF2D)                     | 1383    | 1006    | 1499        | 1291        |
| -  | total protein (strep-PE) 1     | 724525  | 631391  | 819697      | 934574      |
| -  | total protein (strep-PE) 2     | 727482  | 633040  | 821239      | 934672      |
| -  | total protein (strep-PE) 3     | 723749  | 631988  | 826719      | 940033      |

## Supplementary Table 4B

DigiWest-based Log2 fold changes of respective Namodenoson-treated samples vs. mean control. Data were normalized to total protein signal (strep-PE).

| #  | Fold Change (Log2)             | 20µM Namod. 1 | 20µM Namod. 2 |
|----|--------------------------------|---------------|---------------|
| 1  | Bmi1                           | 0,35          | 0,17          |
| 2  | Ezh2                           | 0,18          | -0,04         |
| 3  | GCN5L2                         | -0,08         | -0,14         |
| 4  | Histone deacetylase 1 (HDAC1)  | -2,10         | -2,10         |
| 5  | Histone deacetylase 2 (HDAC2)  | -0,61         | -0,66         |
| 6  | Histone deacetylase 3 (HDAC3)  | -0,78         | -1,53         |
| 7  | Histone deacetylase 6 (HDAC6)  | -0,40         | -0,20         |
| 8  | Histone H2A.X - phospho_Ser139 | 0,26          | 0,94          |
| 9  | Histone H2B                    | 0,65          | 0,61          |
| 10 | Histone H2B - acetyl_Lys15     | 0,00          | 0,53          |
| 11 | Histone H2B - acetyl_Lys5      | -0,22         | -0,19         |
| 12 | Histone H3                     | 0,11          | -0,15         |
| 13 | Histone H3 - acetyl_Lys14      | 0,41          | 0,91          |
| 14 | Histone H3 - acetyl_Lys18      | 0,74          | 1,18          |
| 15 | Histone H3 - acetyl_Lys23      | 6,13          | 6,19          |
| 16 | Histone H3 - acetyl_Lys9       | 0,63          | 0,55          |
| 17 | Histone H3 - acetyl_Lys9/Lys14 | 0,73          | 0,55          |
| 18 | Histone H3 - dimethyl_Lys4     | 0,52          | 0,65          |
| 19 | Histone H3 - monomethyl_Lys4   | 1,03          | 1,08          |
| 20 | Histone H3 - phospho_Ser10     | -1,97         | -0,99         |
| 21 | Histone H3 - phospho_Thr3      | 0,00          | 0,00          |
| 22 | Histone H3 - trimethyl_Lys27   | -0,12         | -0,11         |
| 23 | Histone H3 - trimethyl_Lys9    | 0,16          | 0,01          |
| 24 | IDH1                           | 0,20          | 0,11          |
| 25 | IDH2                           | 0,26          | 0,05          |
| 26 | JARID1A                        | -0,60         | -0,60         |
| 27 | PCAF (KAT2B)                   | 0,55          | 0,27          |
| 28 | PDI                            | 0,65          | 0,25          |
| 29 | RING1A                         | -0,02         | -0,06         |
| 30 | RING1B                         | 1,17          | 0,74          |
| 31 | SP1                            | -1,44         | -1,89         |
| 32 | SUZ12                          | 0,03          | -0,24         |
| 33 | TBP (TF2D)                     | 0,06          | -0,34         |

## Supplementary Table 4C

Antibody list for DigiWest.

| #  | Antigen                       | Mod-Site(s) | Supplier       | Product No. | Species | MW [kDa] |
|----|-------------------------------|-------------|----------------|-------------|---------|----------|
| 1  | Bmi1                          |             | Cell Signaling | 6964        | rb      | 43, 41   |
| 2  | Ezh2                          |             | Cell Signaling | 5246S       | rb      | 98       |
| 3  | GCN5L2                        |             | Cell Signaling | 3305        | rb      | 94       |
| 4  | Histone deacetylase 1 (HDAC1) |             | Cell Signaling | 2062        | rb      | 62       |
| 5  | Histone deacetylase 2 (HDAC2) |             | Epitomics      | 1603-1      | rb      | 55       |
| 6  | Histone deacetylase 3 (HDAC3) |             | Epitomics      | 1580-1      | rb      | 49       |
| 7  | Histone deacetylase 6 (HDAC6) |             | Millipore      | 07-732      | rb      | 134      |
| 8  | Histone H2A.X - phospho       | Ser139      | Cell Signaling | 9718        | rb      | 15       |
| 9  | Histone H2B                   |             | Cell Signaling | 12364       | rb      | 14       |
| 10 | Histone H2B - acetyl          | Lys15       | Epitomics      | 2170-1      | rb      | 17       |
| 11 | Histone H2B - acetyl          | Lys5        | Millipore      | 07-382      | rb      | 16-14    |
| 12 | Histone H3                    |             | abcam          | ab1791      | rb      | 17       |
| 13 | Histone H3 - acetyl           | Lys14       | Millipore      | 17-10051    | rb      | 17       |
| 14 | Histone H3 - acetyl           | Lys18       | Cell Signaling | 9675        | rb      | 17       |
| 15 | Histone H3 - acetyl           | Lys23       | Cell Signaling | 8848        | rb      | 17       |
| 16 | Histone H3 - acetyl           | Lys9        | Cell Signaling | 9649        | rb      | 17       |
| 17 | Histone H3 - acetyl           | Lys9/Lys14  | Calbiochem     | 382158      | rb      | 17       |
| 18 | Histone H3 - dimethyl         | Lys4        | Epitomics      | 1347-1      | rb      | 17       |
| 19 | Histone H3 - monomethyl       | Lys4        | Cell Signaling | 5326        | rb      | 17       |
| 20 | Histone H3 - phospho          | Ser10       | Cell Signaling | 9701        | rb      | 17       |
| 21 | Histone H3 - phospho          | Thr3        | Millipore      | 17-10141    | rb      | 17       |
| 22 | Histone H3 - trimethyl        | Lys27       | Cell Signaling | 9756        | rb      | 17       |
| 23 | Histone H3 - trimethyl        | Lys9        | Millipore      | 07-523      | rb      | 17       |
| 24 | IDH1                          |             | Cell Signaling | 8137        | rb      | 46       |
| 25 | IDH2                          |             | abcam          | ab55271     | ms      | 50       |
| 26 | JARID1A (H3 K4-demethylase)   |             | Cell Signaling | 3876        | rb      | 200      |
| 27 | PCAF (KAT2B)                  |             | Cell Signaling | 3378        | rb      | 93       |
| 28 | PDI                           |             | Cell Signaling | 3501        | rb      | 57       |
| 29 | RING1A                        |             | Cell Signaling | 2820        | rb      | 58       |
| 30 | RING1B                        |             | Cell Signaling | 5694        | rb      | 41       |
| 31 | SP1                           |             | Cell Signaling | 9389        | rb      | 90       |
| 32 | SUZ12                         |             | Cell Signaling | 3737        | rb      | 83       |
| 33 | TBP (TF2D)                    |             | Cell Signaling | 8515        | rb      | 38       |

## Supplementary Table 5

Primers for quantitative real-time qRT-PCR for mRNA quantification.

| Oligo Name      | Sequence (5' - 3')   | Reference / designed by |
|-----------------|----------------------|-------------------------|
| <b>HDAC1-F</b>  | CATCTCCTCAGCATTGGCTT | Tao et al.              |
| <b>HDAC1-R</b>  | CGAATCCGCATGACTCATAA | Tao et al.              |
| <b>HDAC2-F</b>  | ATGAGGCTTCATGGGATGAC | Tao et al.              |
| <b>HDAC2-R</b>  | ATGGCGTACAGTCAAGGAGG | Tao et al.              |
| <b>HDAC3-F</b>  | CTGTGTAACGCGAGCAGAAC | Tao et al.              |
| <b>HDAC3-R</b>  | GCAAGGCTTCACCAAGAGTC | Tao et al.              |
| <b>HDAC4-F</b>  | CTGGTCTCGGCCAGAAAGT  | Tao et al.              |
| <b>HDAC4-R</b>  | CGTGGAATTTTGAGCCATT  | Tao et al.              |
| <b>HDAC5-F</b>  | GAACTGGGCATGGCTCTTG  | Tao et al.              |
| <b>HDAC5-R</b>  | GGGAACCATCCTTGGAATC  | Tao et al.              |
| <b>HDAC6-F</b>  | GCGGTGGATGGAGAAATAGA | Tao et al.              |
| <b>HDAC6-R</b>  | CCGGAGGGTCCTTATCGTAG | Tao et al.              |
| <b>HDAC7-F</b>  | CCTGCTGTTGTCACCGC    | Saha et al.             |
| <b>HDAC7-R</b>  | TCCTCTCCAGCTCAGAGACC | Saha et al.             |
| <b>HDAC8-F</b>  | GCGTGATTTCCAGCACATAA | Tao et al.              |
| <b>HDAC8-R</b>  | ATACTTGACCGGGGTCATCC | Tao et al.              |
| <b>HDAC9-F</b>  | GCCCACAGGAACTTCTGACT | Tao et al.              |
| <b>HDAC9-R</b>  | GAACTCTAAGCCAGATGGGG | Tao et al.              |
| <b>HDAC10-F</b> | GAACAGCCACATCCAGGG   | Tao et al.              |
| <b>HDAC10-R</b> | CCTCTTAGATGGGATGCTGG | Tao et al.              |
| <b>HDAC11-F</b> | AAGGAAGTTGGGGAGGAAGA | Tao et al.              |
| <b>HDAC11-R</b> | GCACACGAGGCGCTATCTTA | Tao et al.              |

### References

Tao, Y.-F., et al., Differential mRNA expression levels of human histone-modifying enzymes in normal karyotype B cell pediatric acute lymphoblastic leukemia. *Int J Mol Sci*, 2013. 14(2): p. 3376-3394.

Saha, A., et al., Epigenetic silencing of tumor suppressor genes during in vitro Epstein–Barr virus infection. *Proc Natl Acad Sci USA*, 2015. 112(37): p. E5199.
